# Supplementary material
Source: PubMed Central journal article supplement (PMC4891202)

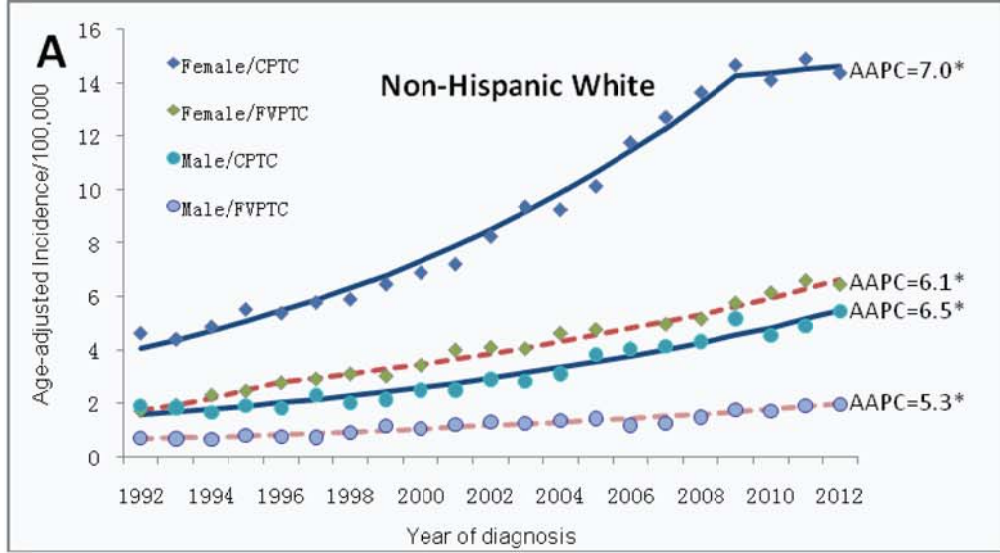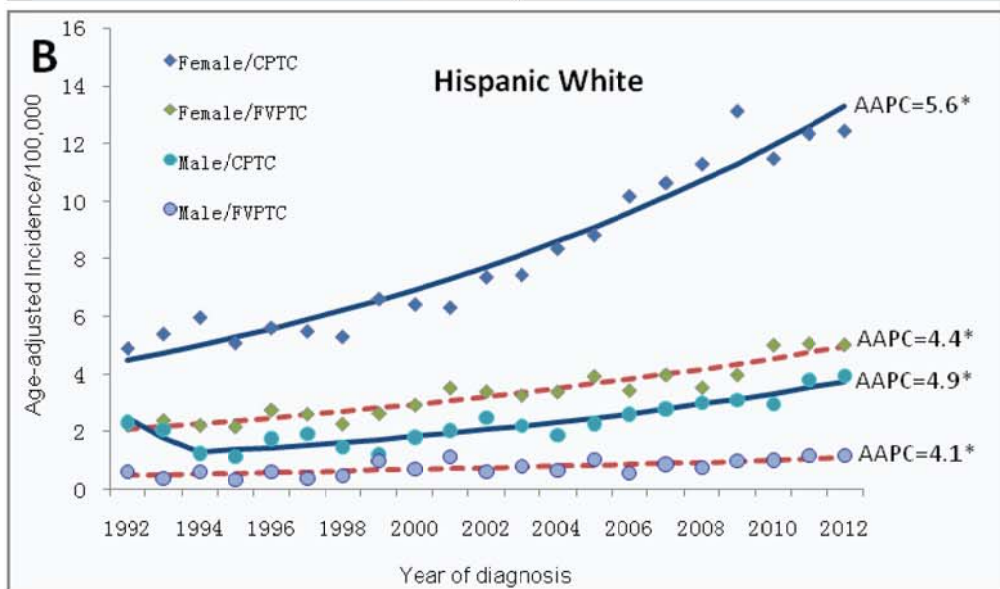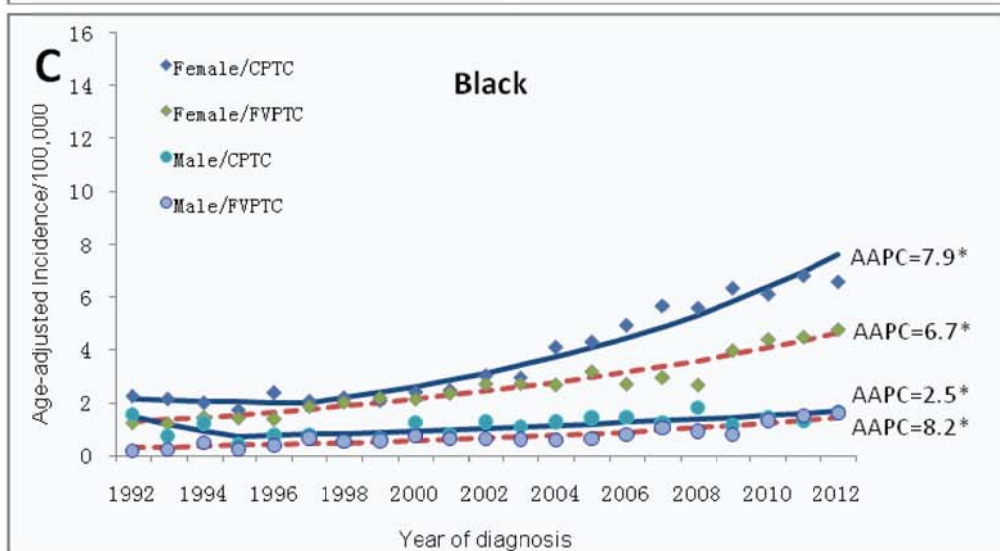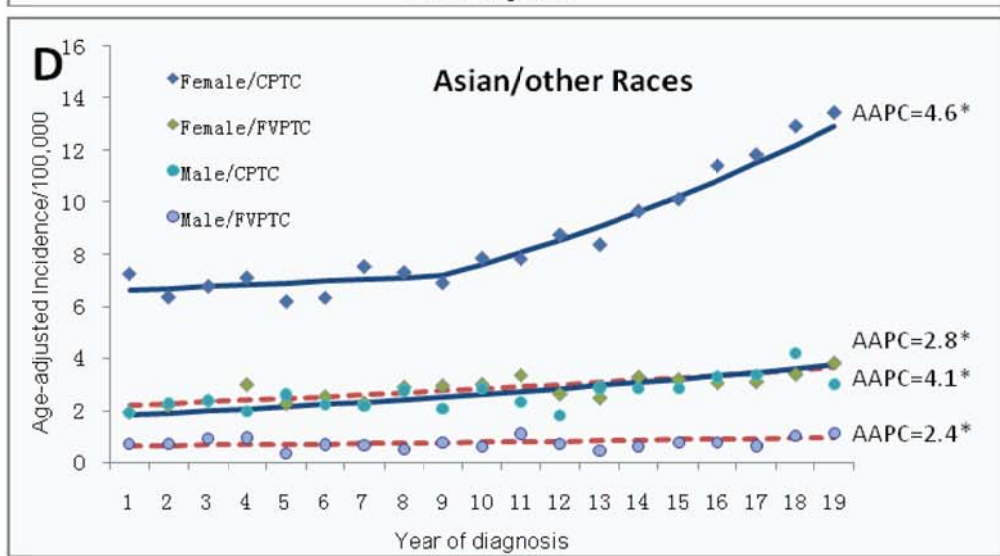

Supplement: NIHMS788165-supplement-05.pdf [file NIHMS788165-supplement-05.pdf]
